# Supplementary material for: Identifying Individuals with Antisocial Personality Disorder Using Resting-State fMRI
Source: PLoS One. 2013 Apr 12;8(4):e60652. doi: 10.1371/journal.pone.0060652 (PMC3625191; doi:10.1371/journal.pone.0060652)
Supplement: Text S2 — Kendall Tau Rank Correlation Coefficient. (DOC) [file pone.0060652.s004.doc]

**Text S2: Kendall Tau Rank Correlation Coefficient**

Suppose that there are *m* samples in the ASPD group and *n* samples in the control group. Let  denotes the functional connectivity feature  of the th sample and  denotes the class label of this sample (+1 for ASPD and -1 for controls). The Kendall tau correlation coefficient of the functional connectivity feature can be defined as:

(1)

Where and are the number of concordant and discordant pairs, respectively. Because we don’t consider the relationship of two samples, the total number of sample pairs is . For a pair of observation datasets  and, it is a concordant when

(2)

Correspondingly, it is a discordant pair when

(3)

Thus, the positive correlation coefficient represents the th functional connectivity that exhibits a significant decrease in the ASPD group compared with the control group, while the negative correlation coefficient, represents the th functional connectivity that exhibits a significant increase in the ASPD group compared with the control group. Moreover, this difference increases substantially when the absolute value of the Kendall correlation coefficientis larger.
